# Supplementary material
Source: PubMed Central journal article supplement (PMC4137345)
Supplement: Supp_Table1.pdf [file Supp_Table1.pdf]

## Supplementary Data

SUPPLEMENTARY TABLE S1. PREVIOUS STUDIES ON CARDIOVASCULAR ADVERSE EFFECTS OF STIMULANT MEDICATIONS

| <i>First author</i>                | <i>Outcome</i>                                               | <i>Number of person-years</i> | <i>Groups compared</i>                                                                                                         |
|------------------------------------|--------------------------------------------------------------|-------------------------------|--------------------------------------------------------------------------------------------------------------------------------|
| <i>In adults</i>                   |                                                              |                               |                                                                                                                                |
| Holick et al. (2009)               | Cerebrovascular event transient ischemic attack <sup>a</sup> | Data not presented            | Patients with ADHD, atomoxetine-users vs. stimulant-users                                                                      |
| Habel et al. (2011)                | Serious cardiovascular events <sup>a</sup>                   | 806,182                       | Non-users vs. users and past users (independent of diagnosis of ADHD)                                                          |
| Schelleman et al. (2012)           | Sudden death or ventricular arrhythmia <sup>b</sup>          | 465,700                       | Non-users vs. users (independent of diagnosis of ADHD)                                                                         |
| <i>In children and adolescents</i> |                                                              |                               |                                                                                                                                |
| Winterstein et al. (2007)          | Emergency department visits <sup>b</sup>                     | 124,932                       | Patients with ADHD, non-users vs. users and past users                                                                         |
| Winterstein et al. (2009)          | Emergency department visits <sup>a</sup>                     | 52,783                        | Patients with ADHD, methylphenidate-users vs. amphetamine-users                                                                |
| Gould et al. (2009)                | Sudden unexplained death <sup>a</sup>                        | Data not presented            | Stimulant use in 564 cases of sudden death compared with 564 cases of young people who died in motor vehicle traffic accidents |
| McCarthy et al. (2009)             | Sudden death <sup>a</sup>                                    | 18,637                        | Patients with any disorder, non-users vs. users                                                                                |
| Schelleman et al. (2011)           | All causes of death <sup>a</sup>                             | 2,179,757                     | Non-users vs. users (independent of diagnosis of ADHD)                                                                         |
| Cooper et al. (2011)               | Serious cardiovascular events <sup>a</sup>                   | 2,579,104                     | Non-users vs. users and past users (independent of diagnosis of ADHD)                                                          |
| Olfson et al. (2012)               | Any cardiovascular events <sup>a</sup>                       | 304,310                       | Patients with ADHD, non-users vs. users and past users                                                                         |
| <i>Present study</i>               |                                                              |                               |                                                                                                                                |
| Dalsgaard et al. (2014)            | Any cardiovascular event                                     | 6,767,982                     | Non-users vs. users and past users, both patients with ADHD and population level independent of diagnosis of ADHD              |

<sup>a</sup>No increased risk for the outcome associated with the exposure.

<sup>b</sup>Increased risk for the outcome associated with the exposure.
