# Supplementary material
Source: PubMed Central journal article supplement (PMC4137345)
Supplement: Supp_Table3.pdf [file Supp_Table3.pdf]

SUPPLEMENTARY TABLE S3. CHILDREN WITH ADHD, CHANGE IN DOSE THE PRIOR 12 MONTHS

|                                          | <i>Children with a<br/>cardiovascular<br/>event (percentage)</i> | <i>Children without a<br/>cardiovascular<br/>event (percentage)</i> |
|------------------------------------------|------------------------------------------------------------------|---------------------------------------------------------------------|
| Dose increased to high or medium dose    | 11%                                                              | 8%                                                                  |
| Dose decreased from high or medium dose  | 43%                                                              | 24%                                                                 |
| Dose unchanged within the last 12 months | 46%                                                              | 68%                                                                 |
|                                          | 100%                                                             | 100%                                                                |
