# Supplementary material
Source: PubMed Central journal article supplement (PMC4137345)
Supplement: Supp_Table4.pdf [file Supp_Table4.pdf]

SUPPLEMENTARY TABLE S4. DOSAGE IN SIX SUBJECTS, WHO DIED DURING THE STUDY PERIOD,  
IN THE 12 MONTHS PERIOD PRIOR TO DEATH

|         | <i>Highest daily dose<br/>ever after the age of 5</i> | <i>Number of months prior to death</i> |           |           |          |          |          |          |          |          |          |          | <i>At the time<br/>of death</i> |          |
|---------|-------------------------------------------------------|----------------------------------------|-----------|-----------|----------|----------|----------|----------|----------|----------|----------|----------|---------------------------------|----------|
|         |                                                       | <i>12</i>                              | <i>11</i> | <i>10</i> | <i>9</i> | <i>8</i> | <i>7</i> | <i>6</i> | <i>5</i> | <i>4</i> | <i>3</i> | <i>2</i> |                                 | <i>1</i> |
| Child 1 | 15 mg                                                 | 1                                      | 1         | 1         | 1        | 1        | 1        | 1        | 1        | 1        | 1        | 1        | 1                               | 1        |
| Child 2 | 30 mg                                                 | 3                                      | 3         | 3         | 3        | 3        | 3        | 3        | 3        | 3        | 3        | 3        | 3                               | NU       |
| Child 3 | 30 mg                                                 | NU                                     | NU        | NU        | NU       | 1        | 3        | 3        | 2        | 3        | 2        | 2        | 3                               | 3        |
| Child 4 | 36 mg                                                 | NU                                     | NU        | 1         | 1        | 1        | NU                              | NU       |
| Child 5 | 54 mg                                                 | NU                                     | NU        | NU        | NU       | NU       | NU       | NU       | NU       | NU       | NU       | NU       | NU                              | NU       |
| Child 6 | 54 mg                                                 | 1                                      | 1         | 1         | 1        | 2        | 2        | 1        | 1        | 1        | 1        | 2        | 2                               | 2        |

NU corresponds to non-use

1 corresponds to low dose (<15 mg per day)

2 corresponds to medium dose (15–30 mg per day)

3 corresponds to high dose (>30 mg per day)
